# Supplementary material for: Isolation of Bacillus licheniformis strain Sh-19 from Soil: Identification by 16S rRNA Gene Sequencing and Characterization of α-Amylase Enzyme
Source: Research Square preprint supplement (doi:10.21203/rs.3.rs-6180850/v1), 2025-04-16

***Bacillus licheniformis* strain sh19 16S ribosomal RNA gene, partial sequence**

**GenBank: MG893095.1**

[FASTA](https://www.ncbi.nlm.nih.gov/nuccore/MG893095.1?report=fasta) [Graphics](https://www.ncbi.nlm.nih.gov/nuccore/MG893095.1?report=graph)

[Go to:](https://www.ncbi.nlm.nih.gov/nuccore/MG893095" \l "goto1434684957_0)

LOCUS MG893095 1387 bp DNA linear BCT 31-JUL-2018

DEFINITION *Bacillus licheniformis* strain sh19 16S ribosomal RNA gene, partial

sequence.

ACCESSION MG893095

VERSION MG893095.1

KEYWORDS .

SOURCE Bacillus licheniformis

ORGANISM [Bacillus licheniformis](https://www.ncbi.nlm.nih.gov/Taxonomy/Browser/wwwtax.cgi?id=1402)

Bacteria; Firmicutes; Bacilli; Bacillales; Bacillaceae; Bacillus.

REFERENCE 1 (bases 1 to 1387)

AUTHORS Ibrahim,A.M. and Hasab,S.R.

TITLE Direct Submission

JOURNAL Submitted (03-FEB-2018) Microb. Biotech. Depart., University of

Sadat Ciy, Gen. Eng. and Biotech Res. Inst, Sadat City, Menoufiya

P.O. Box 32887-79, Egypt

COMMENT ##Assembly-Data-START##

Sequencing Technology :: Sanger dideoxy sequencing

##Assembly-Data-END##

FEATURES Location/Qualifiers

source 1..1387

/organism="Bacillus licheniformis"

/mol_type="genomic DNA"

/strain="sh19"

/db_xref="taxon:[1402](https://www.ncbi.nlm.nih.gov/Taxonomy/Browser/wwwtax.cgi?id=1402)"

[rRNA](https://www.ncbi.nlm.nih.gov/nuccore/MG893095.1?from=1&to=1387) <1..>1387

/product="16S ribosomal RNA"

ORIGIN

1 ttgctccctg atgttagcgg cggacgggtg agtaacacgt gggtaacctg cctgtaagac

61 tgggataact ccgggaaacc ggggctaata ccggatgctt gattgaaccg catggttcaa

121 ttataaaagg tggcttttag ctaccactta caaatggacc cccggcccat tacctagttg

181 gtgaggtaac ggctcaccaa ggcaacaatc cgtacccaac ctgaaagggt gatcggccac

241 cctggaactg aaacccggcc caaactccta cggaaggcag cattagggaa tcttccgcaa

301 ggaacaaaag tctgacgaac caccgccccg tgattaatga aggttttcga atcgtaaaac

361 tctgttgtta gggaagaaca agtaccgttc gaatagggcg gtaccttgac ggtacctaac

421 cagaaagcca cggctaacta cgtgccagca gccgcggtaa tacgtaggtg gcaagcgttg

481 tccggaatta ttgggcgtaa agcgcgcgca ggcggtttct taagtctgat gtgaaagccc

541 ccggctcaac cggggagggt cattggaaac tggggaactt gagtgcagaa gaggagagtg

601 gaattccacg tgtagcggtg aaatgcgtag agatgtggag gaacaccagt ggcgaaggcg

661 actctctggt ctgtaactga cgctgaggcg cgaaagcgtg gggagcgaac aggattagat

721 accctggtag tccacgccgt aaacgatgag tgctaagtgt tagagggttt ccgcccttta

781 gtgctgcagc aaacgcatta agcactccgc ctggggagta cggtcgcaag actgaaactc

841 aaaggaattg acgggggccc gcacaagcgg tggagcatgt ggtttaattc gaagcaacgc

901 gaagaacctt accaggtctt gacatcctct gacaacccta gagatagggc ttccccttcg

961 ggggcagagt gacaggtggt gcatggttgt cgtcagctcg tgtcgtgaga tgttgggtta

1021 agtcccgcaa cgagcgcaac ccttgatctt agttgccagc attcagttgg gcactctaag

1081 gtgactgccg gtgacaaacc ggaggaaggt ggggatgacg tcaaatcatc atgcccctta

1141 tgacctgggc tacacacgtg ctacaatggg cagaacaaag ggcagcgaag ccgcgaggct

1201 aagccaatcc cacaaatctg ttctcagttc ggatcgcagt ctgcaactcg actgcgtgaa

1261 gctggaatcg ctagtaatcg cggatcagca tgccgcggtg aatacgttcc cgggccttgt

1321 acacaccgcc cgtcacacca cgagagtttg taacacccga agtcggtgag gtaacctttt

1381 ggagcca

//

Multiple sequence alignment by CLUSTAL (2.1) of *B. licheniformis* strain Sh19

KF963618.1 GGCGGCGTGCCTAATACATGCAAGTCGAGCGGACAGATGGGAGCTTGCTCCCTGATGTTA

MG893095.1 --------------------------------------------TTGCTCCCTGATGTTA

MN371805.1 --CGGCGTGCCTA-TACATGCA-GTCGAGCGGACAGATGGGAGCTTGCTCCCTGATGTTA

MN371798.1 --CGGCGTGCCTA-TACATGCA-GTCGAGCGGACAGATGGGAGCTTGCTCCCTGATGTTA

KF664028.1 ------------------TGCA-GTCGAGCGGACAGATGGGAGCTTGCTCCCTGATGTCA

************** *

KF963618.1 GCGGCGGACGGGTGAGTAACACGTGGGTAACCTGCCTGTAAGACTGGGATAACTCCGGGA

MG893095.1 GCGGCGGACGGGTGAGTAACACGTGGGTAACCTGCCTGTAAGACTGGGATAACTCCGGGA

MN371805.1 GCGGCGGACGGGTGAGTAACACGTGGGTAACCTGCCTGTAAGACTGGGATAACTCCGGGA

MN371798.1 GCGGCGGACGGGTGAGTAACACGTGGGTAACCTGCCTGTAAGACTGGGATAACTCCGGGA

KF664028.1 GCGGCGGACGGGTGAGTAACACGTGGGTAACCTGCCTGTAAGACTGGGATAACTCCGGGA

************************************************************

KF963618.1 AACCGGGGCTAATACCGGATGCTTGATTGAACCGCATGGTTCAATTATAAAAGGTGGCTT

MG893095.1 AACCGGGGCTAATACCGGATGCTTGATTGAACCGCATGGTTCAATTATAAAAGGTGGCTT

MN371805.1 AACCGGGGCTAATACCGGATGCTTGATTGAACCGCATGGTTCAATTATAAAAGGTGGCTT

MN371798.1 AACCGGGGCTAATACCGGATGCTTGATTGAACCGCATGGTTCAATTATAAAAGGTGGCTT

KF664028.1 AACCGGGGCTAATACCGGATGCTTGATTGAACCGCATGGTTCAATTATAAAAGGTGGCTT

************************************************************

KF963618.1 TTACCTACCACTTACAAATGGACCCGCGGCGCATTACCTAGTTGGGGAGGTAACGGCTCA

MG893095.1 TTAGCTACCACTTACAAATGGACCCCCGGCCCATTACCTAGTTGGTGAGGTAACGGCTCA

MN371805.1 TTACCTACCACTTACAAATGGACCCCCGCCGCATTACCTATTTGGTGAGGTAACGGCTCA

MN371798.1 TTACCTACCACTTACAAATGGACCCCCGCCGCATTACCTATTTGGTGAGGTAACGGCTCA

KF664028.1 TTACCTACCACTTACAAATGGACCCGCGGCGCATTACCTAGTTGGTGAGGTAACGGCTCA

*** ********************* ** * ********* **** **************

KF963618.1 CCAAGGCAACAATGCGTACCCAACCTGAAAGGGGGATCGGCCACCCGGGAACTGAAACAC

MG893095.1 CCAAGGCAACAATCCGTACCCAACCTGAAAGGGTGATCGGCCACCCTGGAACTGAAACCC

MN371805.1 CCAAGGCAACAATGCTTACCCAACCTGAAAGGGTGATCGGCCACCCTGGAACTGAAACAC

MN371798.1 CCAAGGCAACAATGCTTACCCAACCTGAAAGGGTGATCGGCCACCCTGGAACTGAAACAC

KF664028.1 CCAAGGCAACAATGCGTACCCAACCTGAAAGGGTGATCGGCCACCCGGGAACTGAAACCC

************* * ***************** ************ *********** *

KF963618.1 GGCCCAAACTCCTACGGAAGGCAGCATTAGGGAATCTTCCGCATGGAACAAAAGTCTGAC

MG893095.1 GGCCCAAACTCCTACGGAAGGCAGCATTAGGGAATCTTCCGCAAGGAACAAAAGTCTGAC

MN371805.1 GGCCCAAACTCCTACGGAAGGCACCATTAGGGAATCTTCCCCATTGAACAAAATTCTGAC

MN371798.1 GGCCCAAACTCCTACGGAAGGCACCATTAGGGAATCTTCCCCATTGAACAAAATTCTGAC

KF664028.1 GGCCCAAACTCCTACGGGAGGCACCATTAGGGAATCTTCCGCATGGGACAAAAGTCTGAC

***************** ***** **************** ** * ****** ******

KF963618.1 GAACCACCGCCCCGTGAGT-GATGAAGGTTTTCGAATCGTAAAACTCTGTTGTTAGGGAA

MG893095.1 GAACCACCGCCCCGTGATT-AATGAAGGTTTTCGAATCGTAAAACTCTGTTGTTAGGGAA

MN371805.1 GAACCACCCCCCCTTGAATTGATGAAGGTTTTCGAATCGTAAAACTCTGTTGTTAGGGAA

MN371798.1 GAACCACCCCCCCTTGAATTGATGAAGGTTTTCGAATCGTAAAACTCTGTTGTTAGGGAA

KF664028.1 GAACCACCGCCCCGGGAGT-GATGAAGGTTTTCGAATCGAAAAACTCTGTTGTTAGGAAA

******** **** ** * ****************** ***************** **

KF963618.1 AAACAAGTACCGTTCGATTAGGGCGGTACCTTGACGGTACCTAACCAAAAAGCCACGGCT

MG893095.1 GAACAAGTACCGTTCGAATAGGGCGGTACCTTGACGGTACCTAACCAGAAAGCCACGGCT

MN371805.1 AAACAATTACCGTTCGAATAGGGCGGTACCTTGACGGTACCTAACCAGAAAGCCACGGCT

MN371798.1 AAACAATTACCGTTCGAATAGGGCGGTACCTTGACGGTACCTAACCAGAAAGCCACGGCT

KF664028.1 AAACAAGTACCGTTCGAATAGGGCGGTACCTTGACGGTACCTAACCAGAAAGCCACGGCT

***** ********** ***************************** ************

KF963618.1 AACTACTTGCCACCAGCCGCGGTATTACTTAGGTGGCAAGCGTTGTCCGGAATTATTGGG

MG893095.1 AACTACGTGCCAGCAGCCGCGGTAATACGTAGGTGGCAAGCGTTGTCCGGAATTATTGGG

MN371805.1 AACTACTTGCCACCAGCCGCGGTAATACGTAGGTGGCAAGCGTTGTCCGGAATTATTGGG

MN371798.1 AACTACTTGCCACCAGCCGCGGTAATACGTAGGTGGCAAGCGTTGTCCGGAATTATTGGG

KF664028.1 AACTACGTGCCAGCAGCCGCGGTAATACGTAGGTGGCAAGCGTTGTCCGGAATTATTGGG

****** ***** *********** *** *******************************

KF963618.1 CGTAAAGCGCGCGCAGGCGGTTTCTTAAGTCTGATGTGAAAGCCCCCGGCTCAACCGGGA

MG893095.1 CGTAAAGCGCGCGCAGGCGGTTTCTTAAGTCTGATGTGAAAGCCCCCGGCTCAACCGGGG

MN371805.1 CGTAAAGCGCGCGCAGGCGGTTTCTTAAGTCTGATGTGAAAGCCCCCGGCTCAACCGGGG

MN371798.1 CGTAAAGCGCGCGCAGGCGGTTTCTTAAGTCTGATGTGAAAGCCCCCGGCTCAACCGGGG

KF664028.1 CGTAAAGCGCGCGCAGGCGGTTTCTTAAGTCTGA-GTGAAAGCCCCCGGCTCAACCGGGG

********************************** ************************

KF963618.1 AGGGTCATT-GGAAACTGGGGAACTTGAGTGCAGAAGAGGAGAGTGGAATTCCACGTGTA

MG893095.1 AGGGTCATT-GGAAACTGGGGAACTTGAGTGCAGAAGAGGAGAGTGGAATTCCACGTGTA

MN371805.1 AGGGTCATT-GGAAACTGGGGAACTTGAGTGCAGAAGAGGAGAGTGGAATTCCACGTGTA

MN371798.1 AGGGTCATT-GGAAACTGGGGAACTTGAGTGCAGAAGAGGAGAGTGGAATTCCACGTGTA

KF664028.1 AGGGTCATTTGGAAACTGGGGAACTTGAGTGCAGAAGAGGAGAGTGGAATTCCACGTGTA

********* **************************************************

KF963618.1 GCGGTGAAATGCGTAGAGATGTGGAGGAACACCAGTGGCGAAGGCGACTCTCTGGTCTGT

MG893095.1 GCGGTGAAATGCGTAGAGATGTGGAGGAACACCAGTGGCGAAGGCGACTCTCTGGTCTGT

MN371805.1 GCGGTGAAATGCGTAGAGATGTGGAGGAACACCAGTGGCGAAGGCGACTCTCTGGTCTGT

MN371798.1 GCGGTGAAATGCGTAGAGATGTGGAGGAACACCAGTGGCGAAGGCGACTCTCTGGTCTGT

KF664028.1 GCGGTGAAATGCGTAGAGATGTGGAGGAACACCAGTGGCGAAGGCGACTCTCTGGTCTGT

************************************************************

KF963618.1 AACTGACGCTGAGGCGCGAAAGCGTGGGGAGCGAACAGGATTAGATACCCTGGTAGTCCA

MG893095.1 AACTGACGCTGAGGCGCGAAAGCGTGGGGAGCGAACAGGATTAGATACCCTGGTAGTCCA

8888888db

MN371805.1 AACTGACGCTGAGGCGCGAAAGCGTGGGGAGCGAACAGGATTAGATACCCTGGTAGTCCA

MN371798.1 AACTGACGCTGAGGCGCGAAAGCGTGGGGAGCGAACAGGATTAGATACCCTGGTAGTCCA

KF664028.1 AACTGACGCTGAGGCGCGAAAGCGTGGGGAGCGAACAGGATTAGATACCCTGGTAGTCCA

************************************************************

KF963618.1 CGCCGTAAACGATGAGTGCTAAGTGTTAGAGGGTTTCCGCCCTTTAGTGCTGCAGCAAAC

MG893095.1 CGCCGTAAACGATGAGTGCTAAGTGTTAGAGGGTTTCCGCCCTTTAGTGCTGCAGCAAAC

MN371805.1 CGCCGTAAACGATGAGTGCTAAGTGTTAGAGGGTTTCCGCCCTTTAGTGCTGCAGCAAAC

MN371798.1 CGCCGTAAACGATGAGTGCTAAGTGTTAGAGGGTTTCCGCCCTTTAGTGCTGCAGCAAAC

KF664028.1 CGCCGTAAACGATGAGTGCTAAGTGTTAGAGGGTTTCCGCCCTTTAGTGCTGCAGCAAAC

************************************************************

KF963618.1 GCATTAAGCACTCCGCCTGGGGAGTACGGTCGCAAGACTGAAACTCAAAGGAATTGACGG

MG893095.1 GCATTAAGCACTCCGCCTGGGGAGTACGGTCGCAAGACTGAAACTCAAAGGAATTGACGG

MN371805.1 GCATTAAGCACTCCGCCTGGGGAGTACGGTCGCAAGACTGAAACTCAAAGGAATTGACGG

MN371798.1 GCATTAAGCACTCCGCCTGGGGAGTACGGTCGCAAGACTGAAACTCAAAGGAATTGACGG

KF664028.1 GCATTAAGCACTCCGCCTGGGGAGTACGGTCGCAAGACTGAAACTCAAAGGAATTGACGG

************************************************************

KF963618.1 GGGCCCGCACAAGCGGTGGAGCATGTGGTTTAATTCGAAGCAACGCGAAGAACCTTACCA

MG893095.1 GGGCCCGCACAAGCGGTGGAGCATGTGGTTTAATTCGAAGCAACGCGAAGAACCTTACCA

MN371805.1 GGGCCCGCACAAGCGGTGGAGCATGTGGTTTAATTCGAAGCAACGCGAAGAACCTTACCA

MN371798.1 GGGCCCGCACAAGCGGTGGAGCATGTGGTTTAATTCGAAGCAACGCGAAGAACCTTACCA

KF664028.1 GGGCCCGCACAAGCGGTGGAGCATGTGGTTTAATTCGAAGCAACGCGAAGAACCTTACCA

************************************************************

KF963618.1 GGTCTTGACATCCTCTGACAACCCTAGAGATAGGGCTTCCCCTTCGGGGGCAGAGTGACA

MG893095.1 GGTCTTGACATCCTCTGACAACCCTAGAGATAGGGCTTCCCCTTCGGGGGCAGAGTGACA

MN371805.1 GGTCTTGACATCCTCTGACAACCCTAGAGATAGGGCTTCCCCTTCGGGGGCAGAGTGACA

MN371798.1 GGTCTTGACATCCTCTGACAACCCTAGAGATAGGGCTTCCCCTTCGGGGGCAGAGTGACA

KF664028.1 GGTCTTGACATCCTCTGACAACCCTAGAGATAGGGCTTCCCCTTCGGGGGCAGAGTGACA

************************************************************

KF963618.1 GGTGGTGCATGGTTGTCGTCAGCTCGTGTCGTGAGATGTTGGGTTAAGTCCCGCAACGAG

MG893095.1 GGTGGTGCATGGTTGTCGTCAGCTCGTGTCGTGAGATGTTGGGTTAAGTCCCGCAACGAG

MN371805.1 GGTGGTGCATGGTTGTCGTCAGCTCGTGTCGTGAGATGTTGGGTTAAGTCCCGCAACGAG

MN371798.1 GGTGGTGCATGGTTGTCGTCAGCTCGTGTCGTGAGATGTTGGGTTAAGTCCCGCAACGAG

KF664028.1 GGTGGTGCATGGTTGTCGTCAGCTCGTGTCGTGAGATGTTGGGTTAAGTCCCGCAACGAG

************************************************************

KF963618.1 CGCAACCCTTGATCTTAGTTGCCAGCATTCAGTTGGGCACTCTAAGGTGACTGCCGGTGA

MG893095.1 CGCAACCCTTGATCTTAGTTGCCAGCATTCAGTTGGGCACTCTAAGGTGACTGCCGGTGA

MN371805.1 CGCAACCCTTGATCTTAGTTGCCAGCATTCAGTTGGGCACTCTAAGGTGACTGCCGGTGA

MN371798.1 CGCAACCCTTGATCTTAGTTGCCAGCATTCAGTTGGGCACTCTAAGGTGACTGCCGGTGA

KF664028.1 CGCAACCCTTGATCTTAGTTGCCAGCATTCAGTTGGGCACTCTAAGGTGACTGCCGGTGA

************************************************************

KF963618.1 CAAACCGGAGGAAGGTGGGGATGACGTCAAATCATCATGCCCCTTATGACCTGGGCTACA

MG893095.1 CAAACCGGAGGAAGGTGGGGATGACGTCAAATCATCATGCCCCTTATGACCTGGGCTACA

MN371805.1 CAAACCGGAGGAAGGTGGGGATGACGTCAAATCATCATGCCCCTTATGACCTGGGCTACA

MN371798.1 CAAACCGGAGGAAGGTGGGGATGACGTCAAATCATCATGCCCCTTATGACCTGGGCTACA

KF664028.1 CAAACCGGAGGAAGGTGGGGATGACGTCAAATCATCATGCCCCTTATGACCTGGGCTACA

************************************************************

KF963618.1 CACGTGCTACAATGGGCAGAACAAAGGGCAGCGAAGCCGCGAGGCTAAGCCAATCCCACA

MG893095.1 CACGTGCTACAATGGGCAGAACAAAGGGCAGCGAAGCCGCGAGGCTAAGCCAATCCCACA

MN371805.1 CACGTGCTACAATGGGCAGAACAAAGGGCAGCGAAGCCGCGAGGCTAAGCCAATCCCACA

MN371798.1 CACGTGCTACAATGGGCAGAACAAAGGGCAGCGAAGCCGCGAGGCTAAGCCAATCCCACA

KF664028.1 CACGTGCTACAATGGGCAGAACAAAGGGCAGCGAAGCCGCGAGGCTAAGCCAATCCCACA

************************************************************

KF963618.1 AA-TCTGTTCTCAGTTCGGATCGCAGTCTGCAACTCGACTGCGTGAAGCTGGAATCGCTA

MG893095.1 AA-TCTGTTCTCAGTTCGGATCGCAGTCTGCAACTCGACTGCGTGAAGCTGGAATCGCTA

MN371805.1 AAATCTGTTCTCAGTTCGGATCGCAGTCTGCAACTCGACTGCGTGAAGCTGGAATCGCTA

MN371798.1 AAATCTGTTCTCAGTTCGGATCGCAGTCTGCAACTCGACTGCGTGAAGCTGGAATCGCTA

KF664028.1 AA-TCTGTTCTCAGTTCGGATCGCAGTCTGCAACTCGACTGCGTGAAGCTGGAATCGCTA

** *********************************************************

KF963618.1 GTAATCGCGGATCAGCATGCCGCGGTGAATACGTTCCCGGGCCTTGTACACACCGCCCGT

MG893095.1 GTAATCGCGGATCAGCATGCCGCGGTGAATACGTTCCCGGGCCTTGTACACACCGCCCGT

MN371805.1 GTAATCGCGGATCAGCATGCCGCGGTGAATACGTTCCCGGGCCTTGTACACACCGCCCGT

MN371798.1 GTAATCGCGGATCAGCATGCCGCGGTGAATACGTTCCCGGGCCTTGTACACACCGCCCGT

KF664028.1 GTAATCGCGGATCAGCATGCCGCGGTGAATACGTTCCCGGGCCTTGTACACACCGCCCGT

************************************************************

KF963618.1 CACACCACGAGAGTTTGTAACACCCGAAGTCGGTGAGGTAACCTTTTGGAGCCAGCCGCC

MG893095.1 CACACCACGAGAGTTTGTAACACCCGAAGTCGGTGAGGTAACCTTTTGGAGCCA------

MN371805.1 CACACCACGAGAGTTTGTAACACCCGAAGTCGGTGAGGTAACCTTTTGGAGCCAGCCGCC

MN371798.1 CACACCACGAGAGTTTGTAACACCCGAAGTCGGTGAGGTAACCTTTTGGAGCCAGCCGCC

KF664028.1 CACACCACGAGAGTTTGTAACACCCGAAGTCGGTGAGGTAACCTT--GGAGCCAGCCGCC

********************************************* *******

KF963618.1 G---------------------------------------

MG893095.1 ----------------------------------------

MN371805.1 GAAGGTGGGACAGATGATTGGGGTGAAGTCGCAATCAAGG

KF664028.1 GAAGTGAC--------------------------------

**Table :** The accession numbers of the 16S rRNA gene sequence for the two chosen isolates

| **No.** | **Name of the 16S rRNA sequence** | **Accession no.** |
| --- | --- | --- |
| **1** | ***Bacillus licheniformis* strain Sh19 16S rRNA gene, partial sequence** | **MG893095** |
| **2** | ***Bacillus licheniformis* strain Sh19 amylase gene** | **(LC662605)** |

***Bacillus licheniformis* sh19 gene for amylase, partial cds**

GenBank: LC662605.1

[FASTA](https://www.ncbi.nlm.nih.gov/nuccore/LC662605.1?report=fasta) [Graphics](https://www.ncbi.nlm.nih.gov/nuccore/LC662605.1?report=graph)

[Go to:](https://www.ncbi.nlm.nih.gov/nuccore/LC662605.1?report=GenBank" \l "goto2160988637_0)

LOCUS LC662605 790 bp DNA linear BCT 07-DEC-2021

DEFINITION Bacillus licheniformis sh19 gene for amylase, partial cds.

ACCESSION LC662605

VERSION LC662605.1

KEYWORDS .

SOURCE Bacillus licheniformis

ORGANISM [Bacillus licheniformis](https://www.ncbi.nlm.nih.gov/Taxonomy/Browser/wwwtax.cgi?id=1402)

Bacteria; Bacillati; Bacillota; Bacilli; Bacillales; Bacillaceae;

Bacillus.

REFERENCE 1

AUTHORS Hasan,M.E., Hasab,S.R., Abdelmongy,M., Mohamed,A.A. and Hamza,H.

TITLE Isolation and characterization of amylase gene from locally

isolated bacteria, Bacillus licheniformis strain sh19

JOURNAL Unpublished

REFERENCE 2 (bases 1 to 790)

AUTHORS Hasan,M.E., Rafaat,S., Abdelmongy,M., Mohamed,A.A. and Hamza,H.

TITLE Direct Submission

JOURNAL Submitted (30-NOV-2021) Contact:Mohamed E. Hasan Genetic

Engineering and Biotechnology Research Institute (GEBRI),

University of Sadat City, Bioinformatics; Abdel-Moneem Riayad, 5,

Sadat City, Menofia 79-22857, Egypt URL

:http://www.gebri.usc.edu.eg/en

FEATURES Location/Qualifiers

source 1..790

/organism="Bacillus licheniformis"

/mol_type="genomic DNA"

/strain="sh19"

/isolation_source="soil"

/db_xref="taxon:[1402](https://www.ncbi.nlm.nih.gov/Taxonomy/Browser/wwwtax.cgi?id=1402)"

/geo_loc_name="Egypt: Menofia, Sadat City"

/lat_lon="[30.3594 N 30.5327 E](https://www.google.com/maps/place/30.3594+30.5327)"

/collection_date="2021-04-15"

/collected_by="Shimaa Refaat Hasab"

/PCR_primers="fwd_name: AMYF, fwd_seq:

atgaaacaacaaaaacggcttt, rev_name: AMYR, rev_seq:

ctatctttgaacataaattgaaaccg"

[CDS](https://www.ncbi.nlm.nih.gov/nuccore/LC662605.1?from=1&to=790) <1..>790

/codon_start=2

/transl_table=[11](https://www.ncbi.nlm.nih.gov/Taxonomy/Utils/wprintgc.cgi?mode=c#SG11)

/product="amylase"

/protein_id="[BDD35849.1](https://www.ncbi.nlm.nih.gov/protein/2160988638)"

/translation="AVEVDPADRNRVTSGEQRIKAWTHFQFPGRGSTYSDFKWHWYHF

DGTDWDESRKLNRIYKFQGKAWDWEVSNENGNYDYLMYADIDYDHPDVTAEIKRWGTW

YANELQLDGFRLDAVKHIKFSFLRDWVNHVREKTGKEMFTVAEYWQNDLGALEYYLNK

TNFNHSVFDVPLHYQFHAASTQGGGYDMRKLLNGTVVSKHPVKAVTFVDNHDTQPGQS

LESTVQTWFKPLAYAFILTREAGYPQIFYGDMYGTKGASQREIPA"

ORIGIN

1 cgctgttgaa gtcgatcccg ctgaccgcaa ccgcgtaaca tcaggagaac agcgaatcaa

61 agcgtggaca cattttcaat tcccggggcg cggcagcaca tacagcgatt tcaaatggca

121 ttggtaccat tttgacggaa ccgattggga cgagtcccga aagctgaacc gcatctataa

181 gtttcaagga aaggcatggg attgggaagt ttccaatgaa aacggcaact atgattactt

241 gatgtatgcc gacatcgatt atgatcatcc tgatgtcacg gcagaaataa agagatgggg

301 aacgtggtat gccaatgagc tgcaattgga cggattccgc cttgatgccg tcaaacacat

361 taaattttct tttttgcggg attgggtcaa tcatgtcagg gaaaaaacag ggaaggaaat

421 gtttacggta gctgaatatt ggcagaatga cttaggtgcg ctggaatact atttgaacaa

481 aacaaacttt aatcattcag tgtttgacgt gccgcttcat taccagttcc atgctgcatc

541 gacacaggga ggcggctatg atatgaggaa attgctgaac ggaacagtcg tttccaagca

601 tcctgtgaaa gcggttacgt ttgttgataa ccatgataca cagccggggc aatcgcttga

661 gtcgactgtc caaacatggt ttaagccgct ggcttacgct tttattttga caagagaagc

721 aggctacccg cagattttct acggggatat gtacgggacg aaaggagcct cgcagcgcga

781 aattcctgcc

**Bacillus licheniformis sh19 gene for amylase, partial cds Sequence ID:**[**LC662605.1**](https://www.ncbi.nlm.nih.gov/nucleotide/LC662605.1?report=genbank&log$=nuclalign&blast_rank=1&RID=XGS9JDDM016)**Length: 790Number of Matches: 1**

Range 1: 1 to 790[GenBank](https://www.ncbi.nlm.nih.gov/nucleotide/LC662605.1?report=genbank&log$=nuclalign&blast_rank=1&RID=XGS9JDDM016&from=1&to=790)[Graphics](https://www.ncbi.nlm.nih.gov/nuccore/LC662605.1?report=graph&rid=XGS9JDDM016%5bLC662605.1%5d&tracks=%5bkey:sequence_track,name:Sequence,display_name:Sequence,id:STD1,category:Sequence,annots:Sequence,ShowLabel:true%5d%5bkey:gene_model_track,CDSProductFeats:false%5d%5bkey:alignment_track,name:other%20alignments,annots:NG%20Alignments|Refseq%20Alignments|Gnomon%20Alignments|Unnamed,shown:false%5d&v=0:829&appname=ncbiblast&link_loc=fromHSP)Next MatchPrevious Match

| **Alignment statistics for match #1** | | | | |
| --- | --- | --- | --- | --- |
| Score | Expect | Identities | Gaps | Strand |
| 1459 bits(790) | 0.0 | 790/790(100%) | 0/790(0%) | Plus/Plus |

Query 1 CGCTGTTGAAGTCGATCCCGCTGACCGCAACCGCGTAACATCAGGAGAACAGCGAATCAA 60

||||||||||||||||||||||||||||||||||||||||||||||||||||||||||||

Sbjct 1 CGCTGTTGAAGTCGATCCCGCTGACCGCAACCGCGTAACATCAGGAGAACAGCGAATCAA 60

Query 61 AGCGTGGACACATTTTCAATTCCCGGGGCGCGGCAGCACATACAGCGATTTCAAATGGCA 120

||||||||||||||||||||||||||||||||||||||||||||||||||||||||||||

Sbjct 61 AGCGTGGACACATTTTCAATTCCCGGGGCGCGGCAGCACATACAGCGATTTCAAATGGCA 120

Query 121 TTGGTACCATTTTGACGGAACCGATTGGGACGAGTCCCGAAAGCTGAACCGCATCTATAA 180

||||||||||||||||||||||||||||||||||||||||||||||||||||||||||||

Sbjct 121 TTGGTACCATTTTGACGGAACCGATTGGGACGAGTCCCGAAAGCTGAACCGCATCTATAA 180

Query 181 GTTTCAAGGAAAGGCATGGGATTGGGAAGTTTCCAATGAAAACGGCAACTATGATTACTT 240

||||||||||||||||||||||||||||||||||||||||||||||||||||||||||||

Sbjct 181 GTTTCAAGGAAAGGCATGGGATTGGGAAGTTTCCAATGAAAACGGCAACTATGATTACTT 240

Query 241 GATGTATGCCGACATCGATTATGATCATCCTGATGTCACGGCAGAAATAAAGAGATGGGG 300

||||||||||||||||||||||||||||||||||||||||||||||||||||||||||||

Sbjct 241 GATGTATGCCGACATCGATTATGATCATCCTGATGTCACGGCAGAAATAAAGAGATGGGG 300

Query 301 AACGTGGTATGCCAATGAGCTGCAATTGGACGGATTCCGCCTTGATGCCGTCAAACACAT 360

||||||||||||||||||||||||||||||||||||||||||||||||||||||||||||

Sbjct 301 AACGTGGTATGCCAATGAGCTGCAATTGGACGGATTCCGCCTTGATGCCGTCAAACACAT 360

Query 361 TAAATTTTCTTTTTTGCGGGATTGGGTCAATCATGTCAGGGAAAAAACAGGGAAGGAAAT 420

||||||||||||||||||||||||||||||||||||||||||||||||||||||||||||

Sbjct 361 TAAATTTTCTTTTTTGCGGGATTGGGTCAATCATGTCAGGGAAAAAACAGGGAAGGAAAT 420

Query 421 GTTTACGGTAGCTGAATATTGGCAGAATGACTTAGGTGCGCTGGAATACTATTTGAACAA 480

||||||||||||||||||||||||||||||||||||||||||||||||||||||||||||

Sbjct 421 GTTTACGGTAGCTGAATATTGGCAGAATGACTTAGGTGCGCTGGAATACTATTTGAACAA 480

Query 481 AACAAACTTTAATCATTCAGTGTTTGACGTGCCGCTTCATTACCAGTTCCATGCTGCATC 540

||||||||||||||||||||||||||||||||||||||||||||||||||||||||||||

Sbjct 481 AACAAACTTTAATCATTCAGTGTTTGACGTGCCGCTTCATTACCAGTTCCATGCTGCATC 540

Query 541 GACACAGGGAGGCGGCTATGATATGAGGAAATTGCTGAACGGAACAGTCGTTTCCAAGCA 600

||||||||||||||||||||||||||||||||||||||||||||||||||||||||||||

Sbjct 541 GACACAGGGAGGCGGCTATGATATGAGGAAATTGCTGAACGGAACAGTCGTTTCCAAGCA 600

Query 601 TCCTGTGAAAGCGGTTACGTTTGTTGATAACCATGATACACAGCCGGGGCAATCGCTTGA 660

||||||||||||||||||||||||||||||||||||||||||||||||||||||||||||

Sbjct 601 TCCTGTGAAAGCGGTTACGTTTGTTGATAACCATGATACACAGCCGGGGCAATCGCTTGA 660

Query 661 GTCGACTGTCCAAACATGGTTTAAGCCGCTGGCTTACGCTTTTATTTTGACAAGAGAAGC 720

||||||||||||||||||||||||||||||||||||||||||||||||||||||||||||

Sbjct 661 GTCGACTGTCCAAACATGGTTTAAGCCGCTGGCTTACGCTTTTATTTTGACAAGAGAAGC 720

Query 721 AGGCTACCCGCAGATTTTCTACGGGGATATGTACGGGACGAAAGGAGCCTCGCAGCGCGA 780

||||||||||||||||||||||||||||||||||||||||||||||||||||||||||||

Sbjct 721 AGGCTACCCGCAGATTTTCTACGGGGATATGTACGGGACGAAAGGAGCCTCGCAGCGCGA 780

Query 781 AATTCCTGCC 790

||||||||||

Sbjct 781 AATTCCTGCC 790

***Bacillus licheniformis* sh19 gene for amylase, partial cds. Restriction Map**

**07/01/2022 06:26:43790 base pairs**

**Translations: 3 -3**

**Restriction Enzyme Map:**

L L K S I P L T A T A * H Q E N S E S K R G H I F N

1 CGCTGTTGAAGTCGATCCCGCTGACCGCAACCGCGTAACATCAGGAGAACAGCGAATCAAAGCGTGGACACATTTTCAAT 80

1 GCGACAACTTCAGCTAGGGCGACTGGCGTTGGCGCATTGTAGTCCTCTTGTCGCTTAGTTTCGCACCTGTGTAAAAGTTA 80

Q Q L R D R Q G C G R L M L L V A F * L T S V N E I

AlwI MspA1I Hpy188III Hpy8I

FauI

S R G A A A H T A I S N G I G T I L T E P I G T S P E

81 TCCCGGGGCGCGGCAGCACATACAGCGATTTCAAATGGCATTGGTACCATTTTGACGGAACCGATTGGGACGAGTCCCGA 160

81 AGGGCCCCGCGCCGTCGTGTATGTCGCTAAAGTTTACCGTAACCATGGTAAAACTGCCTTGGCTAACCCTGCTCAGGGCT 160

G P A R C C M C R N * I A N T G N Q R F R N P R T G F

AvaI BslI MwoI Acc65I NlaIV TspGWI

BsaJI HpyF10VI BanI BsmFI Hpy188III

XmaI BbvI NlaIV

BsaJI KpnI

SmaI

S * T A S I S F K E R H G I G K F P M K T A T M I T

161 AAGCTGAACCGCATCTATAAGTTTCAAGGAAAGGCATGGGATTGGGAAGTTTCCAATGAAAACGGCAACTATGATTACTT 240

161 TTCGACTTGGCGTAGATATTCAAAGTTCCTTTCCGTACCCTAACCCTTCAAAGGTTACTTTTGCCGTTGATACTAATGAA 240

A S G C R Y T E L F P M P N P L K W H F R C S H N S

PleI SfaNI TspDTI

BsmFI BceAI

MlyI

* C M P T S I M I I L M S R Q K * R D G E R G M P M S

241 GATGTATGCCGACATCGATTATGATCATCCTGATGTCACGGCAGAAATAAAGAGATGGGGAACGTGGTATGCCAATGAGC 320

241 CTACATACGGCTGTAGCTAATACTAGTAGGACTACAGTGCCGTCTTTATTTCTCTACCCCTTGCACCATACGGTTACTCG 320

S T H R C R N H D D Q H * P L F L S I P F T T H W H A

FokI BsaBI Hpy188III BceAI BbvI

ClaI BclI MslI

BstF5I

C N W T D S A L M P S N T L N F L F C G I G S I M S G

321 TGCAATTGGACGGATTCCGCCTTGATGCCGTCAAACACATTAAATTTTCTTTTTTGCGGGATTGGGTCAATCATGTCAGG 400

321 ACGTTAACCTGCCTAAGGCGGAACTACGGCAGTTTGTGTAATTTAAAAGAAAAAACGCCCTAACCCAGTTAGTACAGTCC 400

A I P R I G G Q H R * V C * I K K K A P N P * D H * P

MfeI BceAI TspGWI ApoI FauI

EciI SfaNI

K K Q G R K C L R * L N I G R M T * V R W N T I * T

401 GAAAAAACAGGGAAGGAAATGTTTACGGTAGCTGAATATTGGCAGAATGACTTAGGTGCGCTGGAATACTATTTGAACAA 480

401 CTTTTTTGTCCCTTCCTTTACAAATGCCATCGACTTATAACCGTCTTACTGAATCCACGCGACCTTATGATAAACTTGTT 480

F F L S P F T * P L Q I N A S H S L H A P I S N S C

Hpy8I SspI

K Q T L I I Q C L T C R F I T S S M L H R H R E A A M

481 AACAAACTTTAATCATTCAGTGTTTGACGTGCCGCTTCATTACCAGTTCCATGCTGCATCGACACAGGGAGGCGGCTATG 560

481 TTGTTTGAAATTAGTAAGTCACAAACTGCACGGCGAAGTAATGGTCAAGGTACGACGTAGCTGTGTCCCTCCGCCGATAC 560

F L S * D N L T Q R A A E N G T G H Q M S V P L R S H

TspRI BbvI MnlI MnlI

TspDTI BsrI SfaNI

BmgBI

I * G N C * T E Q S F P S I L * K R L R L L I T M I H

561 ATATGAGGAAATTGCTGAACGGAACAGTCGTTTCCAAGCATCCTGTGAAAGCGGTTACGTTTGTTGATAACCATGATACA 640

561 TATACTCCTTTAACGACTTGCCTTGTCAGCAAAGGTTCGTAGGACACTTTCGCCAATGCAAACAACTATTGGTACTATGT 640

Y S S I A S R F L R K W A D Q S L P * T Q Q Y G H Y V

FokI TspGWI SfaNI

BstF5I

S R G N R L S R L S K H G L S R W L T L L F * Q E K

641 CAGCCGGGGCAATCGCTTGAGTCGACTGTCCAAACATGGTTTAAGCCGCTGGCTTACGCTTTTATTTTGACAAGAGAAGC 720

641 GTCGGCCCCGTTAGCGAACTCAGCTGACAGGTTTGTACCAAATTCGGCGACCGAATGCGAAAATAAAACTGTTCTCTTCG 720

A P A I A Q T S Q G F M T * A A P K R K * K S L L L

BsaJI SmlI AccI MlyI BpuEI MspA1I

SalI PleI Cac8I

HincII

Hpy8I

Q A T R R F S T G I C T G R K E P R S A K F L

721 AGGCTACCCGCAGATTTTCTACGGGGATATGTACGGGACGAAAGGAGCCTCGCAGCGCGAAATTCCTGCC 790

721 TCCGATGGGCGTCTAAAAGATGCCCCTATACATGCCCTGCTTTCCTCGGAGCGTCGCGCTTTAAGGACGG 790

L S G A S K R R P Y T R S S L L R A A R F E Q

Cac8I FauI NlaIV MnlI

BcgI ApoI

BsmFI BbvI

Restriction table:

Enzyme Recognition frequency Positions

__________________________________________________________________________

AccI GT'mk_AC 1 663

Acc65I G'GTAC_C 1 124

AlwI GGATCnnnn'n_ 1 9

ApoI r'AATT_y 2 363, 781

AvaI C'yCGr_G 1 83

BanI G'GyrC_C 1 124

BbvI GCAGCnnnnnnnn'nnnn_ 4 106, 307, 521, 785

BceAI ACGGCnnnnnnnnnnnn'nn_ 3 239, 295, 333

BcgI GCAnnnnnnTCGnnnnnnnnnn_nn' 1 768

BclI T'GATC_A 1 263

BmgBI CAC'GTC 1 509

BpuEI CTTGAGnnnnnnnnnnnnnn_nn' 1 678

BsaBI GATnn'nnATC 1 262

BsaJI C'CnnG_G 3 83, 84, 645

BslI CCnn_nnn'nnGG 1 90

BsmFI GGGACnnnnnnnnnn'nnnn_ 3 140, 162, 770

BsrI ACTG_Gn' 1 524

BstF5I GGATG_nn' 2 266, 599

Cac8I GCn'nGC 2 691, 722

ClaI AT'CG_AT 1 256

EciI GGCGGAnnnnnnnnn_nn' 1 327

FauI CCCGCnnnn'nn_ 3 26, 370, 736

FokI GGATGnnnnnnnnn'nnnn_ 2 253, 586

HincII GTy'rAC 1 664

Hpy8I GTn'nAC 3 67, 424, 664

Hpy188III TC'nn_GA 3 43, 157, 270

HpyF10VI GCn_nnnnn'nGC 1 104

KpnI G_GTAC'C 1 128

MfeI C'AATT_G 1 324

MlyI GAGTCnnnnn' 2 162, 669

MnlI CCTCnnnnnn_n' 3 543, 559, 779

MslI CAynn'nnrTG 1 271

MspA1I CmG'CkG 2 21, 689

MwoI GCnn_nnn'nnGC 1 103

NlaIV GGn'nCC 3 126, 140, 767

PleI GAGTCnnnn'n_ 2 161, 668

SalI G'TCGA_C 1 662

SfaNI GCATCnnnnn'nnnn_ 4 181, 335, 546, 608

SmaI CCC'GGG 1 85

SmlI C'TyrA_G 1 657

SspI AAT'ATT 1 438

TspDTI ATGAAnnnnnnnnn_nn' 2 232, 507

TspGWI ACGGAnnnnnnnnn_nn' 3 151, 346, 595

TspRI _nnCAsTGnn' 1 505

XmaI C'CCGG_G 1 83

Enzymes that cut five or fewer times

Enzyme Recognition frequency Positions

__________________________________________________________________________

AccI GT'mk_AC 1 663

Acc65I G'GTAC_C 1 124

AlwI GGATCnnnn'n_ 1 9

ApoI r'AATT_y 2 363, 781

AvaI C'yCGr_G 1 83

BanI G'GyrC_C 1 124

BbvI GCAGCnnnnnnnn'nnnn_ 4 106, 307, 521, 785

BceAI ACGGCnnnnnnnnnnnn'nn_ 3 239, 295, 333

BcgI GCAnnnnnnTCGnnnnnnnnnn_nn' 1 768

BclI T'GATC_A 1 263

BmgBI CAC'GTC 1 509

BpuEI CTTGAGnnnnnnnnnnnnnn_nn' 1 678

BsaBI GATnn'nnATC 1 262

BsaJI C'CnnG_G 3 83, 84, 645

BslI CCnn_nnn'nnGG 1 90

BsmFI GGGACnnnnnnnnnn'nnnn_ 3 140, 162, 770

BsrI ACTG_Gn' 1 524

BstF5I GGATG_nn' 2 266, 599

Cac8I GCn'nGC 2 691, 722

ClaI AT'CG_AT 1 256

EciI GGCGGAnnnnnnnnn_nn' 1 327

FauI CCCGCnnnn'nn_ 3 26, 370, 736

FokI GGATGnnnnnnnnn'nnnn_ 2 253, 586

HincII GTy'rAC 1 664

Hpy8I GTn'nAC 3 67, 424, 664

Hpy188III TC'nn_GA 3 43, 157, 270

HpyF10VI GCn_nnnnn'nGC 1 104

KpnI G_GTAC'C 1 128

MfeI C'AATT_G 1 324

MlyI GAGTCnnnnn' 2 162, 669

MnlI CCTCnnnnnn_n' 3 543, 559, 779

MslI CAynn'nnrTG 1 271

MspA1I CmG'CkG 2 21, 689

MwoI GCnn_nnn'nnGC 1 103

NlaIV GGn'nCC 3 126, 140, 767

PleI GAGTCnnnn'n_ 2 161, 668

SalI G'TCGA_C 1 662

SfaNI GCATCnnnnn'nnnn_ 4 181, 335, 546, 608

SmaI CCC'GGG 1 85

SmlI C'TyrA_G 1 657

SspI AAT'ATT 1 438

TspDTI ATGAAnnnnnnnnn_nn' 2 232, 507

TspGWI ACGGAnnnnnnnnn_nn' 3 151, 346, 595

TspRI _nnCAsTGnn' 1 505

XmaI C'CCGG_G 1 83

Position Enzyme(s)

__________________________________________________________________________

9 AlwI GGATCnnnn'n_

21 MspA1I CmG'CkG

26 FauI CCCGCnnnn'nn_

43 Hpy188III TC'nn_GA

67 Hpy8I GTn'nAC

83 AvaI C'yCGr_G

83 BsaJI C'CnnG_G

83 XmaI C'CCGG_G

84 BsaJI C'CnnG_G

85 SmaI CCC'GGG

90 BslI CCnn_nnn'nnGG

103 MwoI GCnn_nnn'nnGC

104 HpyF10VI GCn_nnnnn'nGC

106 BbvI GCAGCnnnnnnnn'nnnn_

124 Acc65I G'GTAC_C

124 BanI G'GyrC_C

126 NlaIV GGn'nCC

128 KpnI G_GTAC'C

140 NlaIV GGn'nCC

140 BsmFI GGGACnnnnnnnnnn'nnnn_

151 TspGWI ACGGAnnnnnnnnn_nn'

157 Hpy188III TC'nn_GA

161 PleI GAGTCnnnn'n_

162 BsmFI GGGACnnnnnnnnnn'nnnn_

162 MlyI GAGTCnnnnn'

181 SfaNI GCATCnnnnn'nnnn_

232 TspDTI ATGAAnnnnnnnnn_nn'

239 BceAI ACGGCnnnnnnnnnnnn'nn_

253 FokI GGATGnnnnnnnnn'nnnn_

256 ClaI AT'CG_AT

262 BsaBI GATnn'nnATC

263 BclI T'GATC_A

266 BstF5I GGATG_nn'

270 Hpy188III TC'nn_GA

271 MslI CAynn'nnrTG

295 BceAI ACGGCnnnnnnnnnnnn'nn_

307 BbvI GCAGCnnnnnnnn'nnnn_

324 MfeI C'AATT_G

327 EciI GGCGGAnnnnnnnnn_nn'

333 BceAI ACGGCnnnnnnnnnnnn'nn_

335 SfaNI GCATCnnnnn'nnnn_

346 TspGWI ACGGAnnnnnnnnn_nn'

363 ApoI r'AATT_y

370 FauI CCCGCnnnn'nn_

424 Hpy8I GTn'nAC

438 SspI AAT'ATT

505 TspRI _nnCAsTGnn'

507 TspDTI ATGAAnnnnnnnnn_nn'

509 BmgBI CAC'GTC

521 BbvI GCAGCnnnnnnnn'nnnn_

524 BsrI ACTG_Gn'

543 MnlI CCTCnnnnnn_n'

546 SfaNI GCATCnnnnn'nnnn_

559 MnlI CCTCnnnnnn_n'

586 FokI GGATGnnnnnnnnn'nnnn_

595 TspGWI ACGGAnnnnnnnnn_nn'

599 BstF5I GGATG_nn'

608 SfaNI GCATCnnnnn'nnnn_

645 BsaJI C'CnnG_G

657 SmlI C'TyrA_G

662 SalI G'TCGA_C

663 AccI GT'mk_AC

664 HincII GTy'rAC

664 Hpy8I GTn'nAC

668 PleI GAGTCnnnn'n_

669 MlyI GAGTCnnnnn'

678 BpuEI CTTGAGnnnnnnnnnnnnnn_nn'

689 MspA1I CmG'CkG

691 Cac8I GCn'nGC

722 Cac8I GCn'nGC

736 FauI CCCGCnnnn'nn_

767 NlaIV GGn'nCC

768 BcgI GCAnnnnnnTCGnnnnnnnnnn_nn'

770 BsmFI GGGACnnnnnnnnnn'nnnn_

779 MnlI CCTCnnnnnn_n'

781 ApoI r'AATT_y

785 BbvI GCAGCnnnnnnnn'nnnn_

Enzymes that do not cut:

_________________________________________________________

AarI, AatII, AclI, AfeI, AflII, AflIII, AgeI, AhdI, AleI, AloI, AloI, AlwNI, ApaI

ApaLI, AscI, AseI, AsiSI, AvrII, BaeI, BaeI, BamHI, BanII, BbeI, BbsI, BbvCI, BcgI

BciVI, BfrBI, BglI, BglII, BlpI, Bme1580I, BmrI, BmtI, BplI, BpmI, Bpu10I, BsaI

BsaAI, BsaHI, BsaWI, BsaXI, BsaXI, BseMII, BseRI, BseYI, BsgI, BsiEI, BsiHKAI

BsiWI, BsmI, BsmAI, BsmBI, Bsp1286I, BspCNI, BspEI, BspHI, BspMI, BsrBI, BsrDI

BsrFI, BsrGI, BssHII, BssSI, BstAPI, BstBI, BstEII, BstXI, BstYI, BstZ17I, Bsu36I

BtgI, BtsI, DraI, DraIII, DrdI, EaeI, EagI, EarI, Eco57I, EcoICRI, Eco57MI, EcoNI

EcoO109I, EcoRI, EcoRV, FalI, FseI, FspI, FspAI, HaeII, HgaI, Hin4I, Hin4I

HindIII, HpaI, HphI, KasI, MboII, MluI, MmeI, MscI, NaeI, NarI, NcoI, NdeI, NgoMIV

NheI, NotI, NruI, NsiI, NspI, PacI, PciI, PflMI, PmeI, PmlI, PpiI, PpiI, PpuMI

PshAI, PsiI, PspOMI, PsrI, PsrI, PstI, PvuI, PvuII, RsrII, SacI, SacII, SanDI

SapI, SbfI, ScaI, SexAI, SfcI, SfiI, SfoI, SgrAI, SnaBI, SpeI, SphI, SrfI, StuI

StyI, SwaI, TaqII, TaqII, TatI, Tth111I, XbaI, XcmI, XhoI, XmnI, ZraI

**Fig** . Multiple deduced amino acid sequence alignment of endoglucanase amyl gene (LC662605) from *B. licheniformis* strain-Sh19 with other reported endoglucanases retrieved from NCBI GenBank.


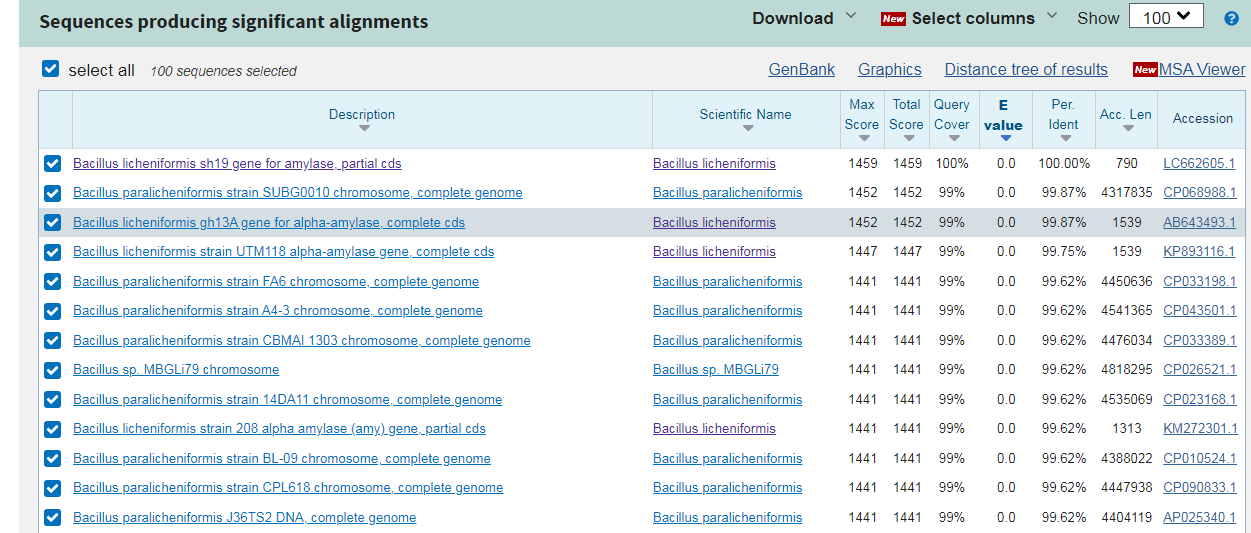

Supplement: Supplementary file 1 [file cdac8aaa44f00530d7df32b3.docx]
